# Supplementary material for: Genome-Wide Identification and Characterization of Heat Shock Protein 20 Genes in Maize
Source: MDPI journal article supplement (doi:10.3390/life12091397), 2022-09-08
Supplement: s1 [file s1]

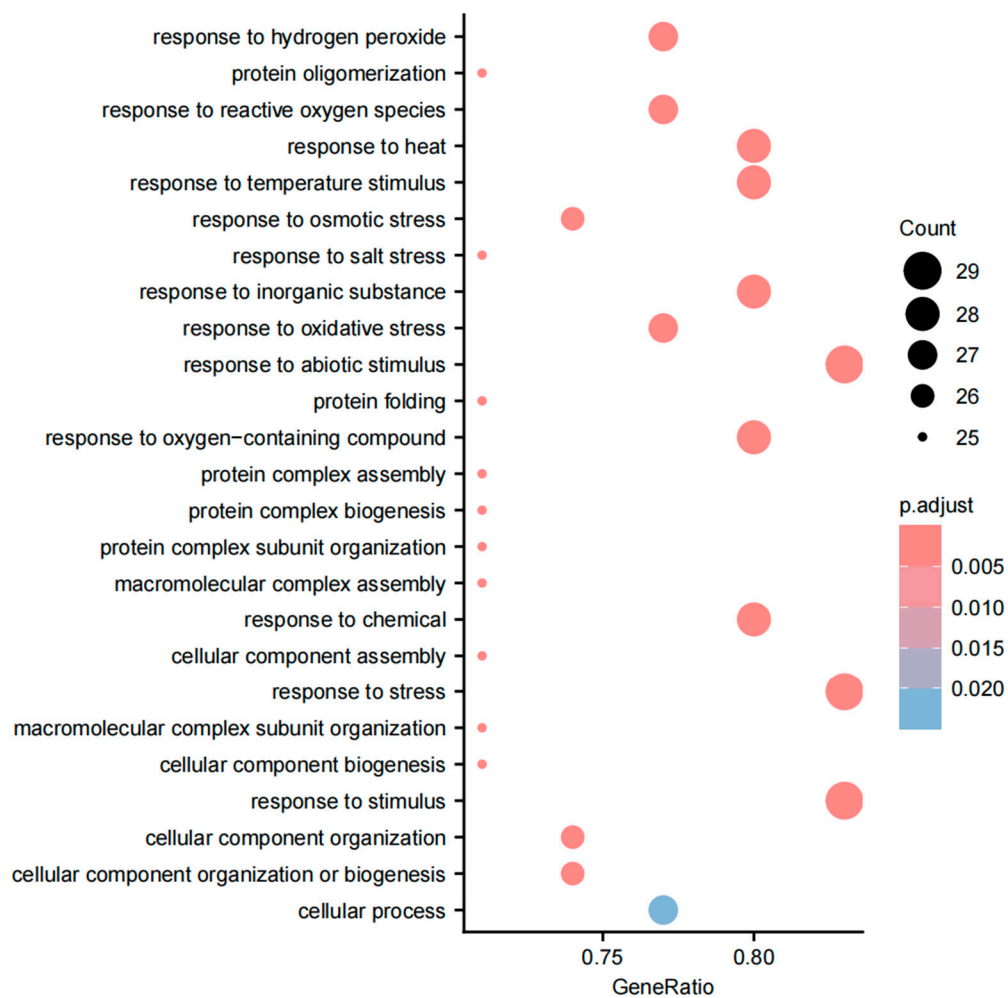

**Figure S1.** Functional analysis of 44 *ZmHSP20s* based on Gene Ontology.

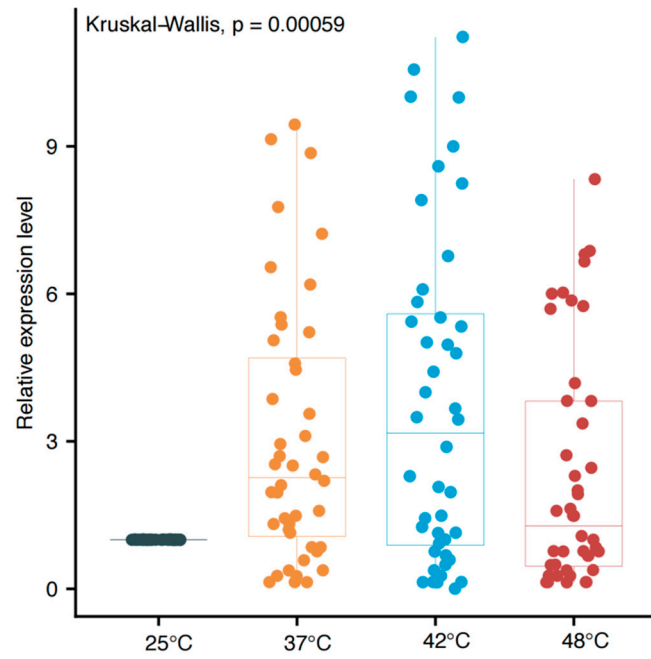

**Figure S2.** Boxplots showing the expression levels of *ZmHSP20s* under heat stress. Expression levels of *ZmHSP20s* increased under 37 °C, 42 °C, and 48 °C conditions, comparing with 25 °C.

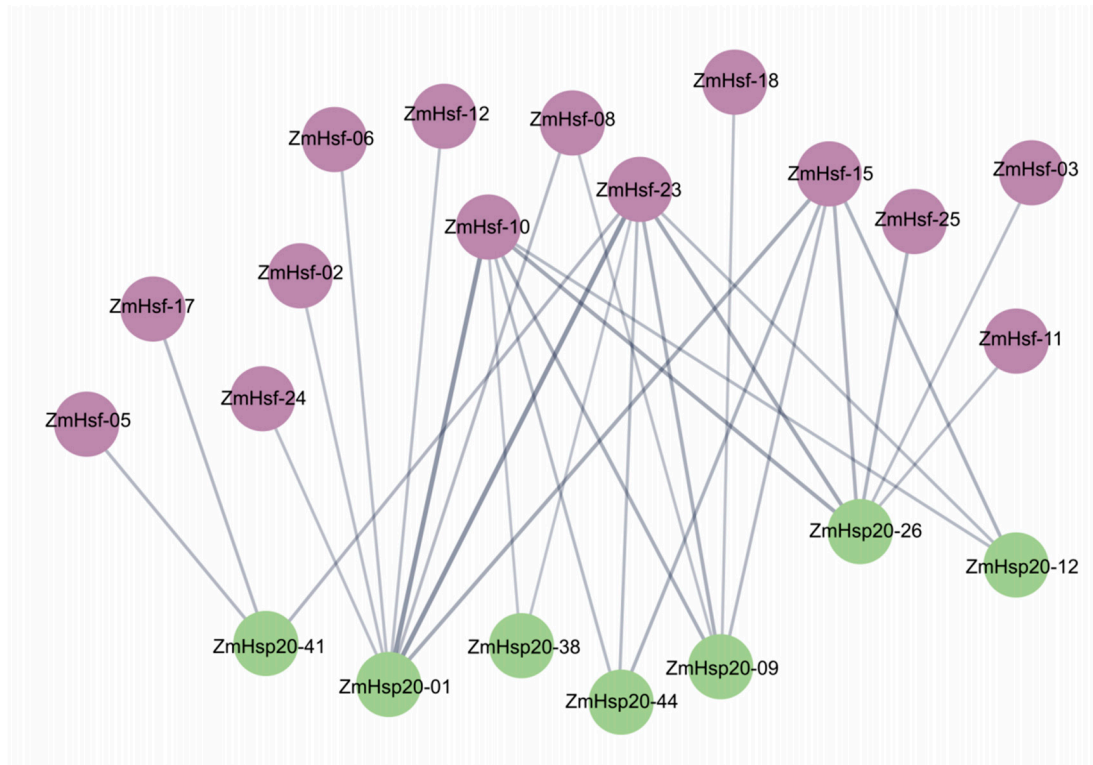

**Figure S3.** Predicted Interaction between ZmHSP20s and ZmHSFs protein using STRING database.

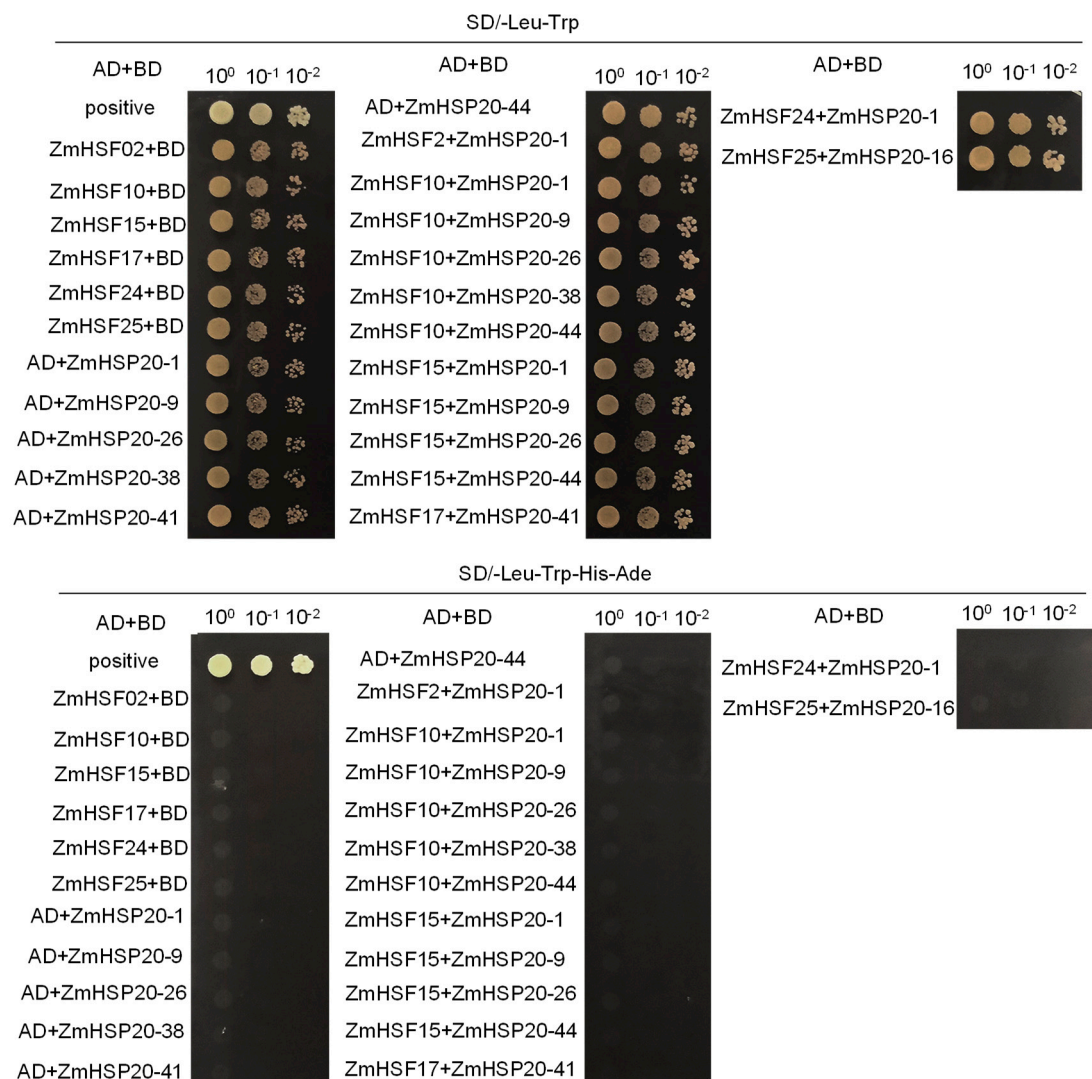

**Figure S4.** The interaction between ZmHSFs and ZmHSP20s based on yeast-two-hybrid experiments. SD, synthetic dropout medium; Leu, leucine; Trp, tryptophan; His, histidine; Ade, adenine.
