# Supplementary material for: Genome-Wide Identification and Characterization of Heat Shock Protein 20 Genes in Maize
Source: Life (Basel). 2022 Sep 8;12(9):1397. doi: 10.3390/life12091397 (PMC9505046; doi:10.3390/life12091397)
Supplement: Supplementary file 1 [file life-12-01397-s001.zip]

Archive with 4 entries (4 files):
- life-1901038-Supplementary Figure.pdf
- Table S1.xlsx
- Table S2.xlsx
- Table S3.xlsx
