# Supplementary material for: Genome-Wide Identification and Characterization of Heat Shock Protein 20 Genes in Maize
Source: Life (Basel). 2022 Sep 8;12(9):1397. doi: 10.3390/life12091397 (PMC9505046; doi:10.3390/life12091397)
Supplement: Supplementary file 1 [file life-12-01397-s001.zip › Table S1.xlsx]

## Sheet: Primer design
Table S1. The primer using in this study.
Name	Sequence-F	Sequence-R	Illustration
ZmHSP20-1	AGCGTGAGCTCCTACGACAT	CAACCCACGCTAGTGCTACA	qRT-PCR
ZmHSP20-2	CAACGTGTTCGATCCCTTCT	CTGGAGTCTCCTTCCAGTCG	qRT-PCR
ZmHSP20-3	CAACGTGTTCGATCCCTTCT	CTGGAGTCTCCTTCCAGTCG	qRT-PCR
ZmHSP20-4	AACAAGGAGCACGAGGAGAA	TGATCTGGACGTTCTTGACG	qRT-PCR
ZmHSP20-5	TGGGAGATCAAGGAAGATGG	CGCACGTTCTCTTTGTCGTA	qRT-PCR
ZmHSP20-6	AGGTCACCGTCCACAAGAAC	AGTCCATCCGCAGCTAGAAA	qRT-PCR
ZmHSP20-7	CACAACCCAAAGACGGATCT	ACCTCGAACCACAGGTTCAC	qRT-PCR
ZmHSP20-8	CTCATGGTGCAGAGGAACAG	TTCTTGGGTCGCTTCTCATC	qRT-PCR
ZmHSP20-9	AGTGAAGGACGGAGTGCTGT	GATATCGCTCTCGTCCCAAG	qRT-PCR
ZmHSP20-10	CGTTCGTCCATCTCCGTTAT	GACGTGCTCCTTCTTGAACC	qRT-PCR
ZmHSP20-11	AGAGGCTGAAGGAGGAGGAG	ACGTAGACGGTGAACCCAAG	qRT-PCR
ZmHSP20-12	CTCCTACGGCAGGTTCTGG	CAGTTCCGATGCTCTCCTTC	qRT-PCR
ZmHSP20-13	GACTTTGTGGGGAAAGTGGA	TCTAACGTCAGCGTCCACAC	qRT-PCR
ZmHSP20-14	AAGGTGGAGGTGGAGGAGAA	AGCACACCGTTCTCCAATCT	qRT-PCR
ZmHSP20-15	AAGTTCATGCGCAAGTTCG	TCGATGGTCTTGGGTTTCTT	qRT-PCR
ZmHSP20-16	CATTCTCCGTGGACCTCTTC	TCACCTCCTCCTTCTTCACG	qRT-PCR
ZmHSP20-17	GGGAGAAGGAGGACAAGGAC	CTTCACCTGATCCACCTTGG	qRT-PCR
ZmHSP20-18	AGGACAAGGACGACAAGTGG	TAGCCTTCACCTCAGGCTTC	qRT-PCR
ZmHSP20-19	CTGGTAAGGCTCCTGGACAC	ACCGTGACCTCCTCCTTCTT	qRT-PCR
ZmHSP20-20	AGGTTCCAGAGGCGGTTC	AGAGATCTCGACAGCCCTGA	qRT-PCR
ZmHSP20-21	CCGTGAAGAAGTTCGGCTAC	CCTTGGCAATGTGTTGTTTG	qRT-PCR
ZmHSP20-22	CGCTTCAGTTTTCGTGTCAA	AATCTGCGGAAACCAAACAC	qRT-PCR
ZmHSP20-23	AGCATGGACTGGAAGGAGAC	AGCCTCTCCTCCTCCACCT	qRT-PCR
ZmHSP20-24	TCAAGAGGGAGGACATACGC	GATGGTGAGCCTGTCGTTCT	qRT-PCR
ZmHSP20-25	GGCATGCTCTACATCCAGGT	TCCTCGTACACCTCCTCCTC	qRT-PCR
ZmHSP20-26	GTGACCAAGCAGAGTGACGA	CGAGGTTGAGAGAAGCGAGT	qRT-PCR
ZmHSP20-27	CATGATGCTCGACAGGTTCT	GACGTCCATCCTGAACACG	qRT-PCR
ZmHSP20-28	CAGCACACCACCTCTACGAA	CTTCCCTTGATCTGGCTCTG	qRT-PCR
ZmHSP20-29	TGTCGAAGCATGTCGAACTC	GTCGTCTTCCTTTGCTCTGG	qRT-PCR
ZmHSP20-30	TTCCTGTTCGGCAACTTCTT	GCAGATGTCGATCACCTTCA	qRT-PCR
ZmHSP20-31	CAAGAGGAACAGGGAGGTGA	TGTGTCTGTGCAGTGCATGT	qRT-PCR
ZmHSP20-32	AGGACCGGATGCTAGTGATG	TCCACTTTCCCCACAAAGTC	qRT-PCR
ZmHSP20-33	GTTCCGCTCGCTATGGATTA	GGGATGAGAGGAGGGAGAAG	qRT-PCR
ZmHSP20-34	GGAGGAGGACAAGAACGACA	TCTTCACCTCCGTCTTAGGC	qRT-PCR
ZmHSP20-35	GATGTTCGGGCTGGAGACT	CGAACTTGCGCATGAACTT	qRT-PCR
ZmHSP20-36	ATACGGAGACGCAGAGATGG	TTGAACAGCTGGCACTGAAG	qRT-PCR
ZmHSP20-37	GGAGGCGGTCAATAACAAGA	TGTCTGCTCCATGATTACGC	qRT-PCR
ZmHSP20-38	AGGAGAAGGGGAAGGAGGAC	CACAACGACGGTGAGAACC	qRT-PCR
ZmHSP20-39	CGAAGATCAAGGACGAGGAG	CAAGCTCATGCCAACTACGA	qRT-PCR
ZmHSP20-40	GCAAGTTCATGCGCAAGTT	AGGCGACCTTAATCTCGATG	qRT-PCR
ZmHSP20-41	GAGAGATGGACGCGAGGAT	CGAACTTGCGCATGAACTT	qRT-PCR
ZmHSP20-42	GCAAGGTCGAAGACAAGGAG	TGATCTTCCTCCACCACCTC	qRT-PCR
ZmHSP20-43	AGCAGCCAAGAAAAGCACAT	AAGGGAAATAAGCCCTGGAA	qRT-PCR
ZmHSP20-44	TCAAGATCGAGGTGGAGGAC	AGTCGAGGTCGGCGTTCT	qRT-PCR
ZmHSF 17-AD2	ATGGACTCAACGCTGAACCAG	CTAATTGCTAGATGTTGGGCCATC	yeast one-hybrid
ZmHSF13-AD2	ATGGACAGTAACAGATCCATGGCGAC	TCAGTAGCCGCCGCTGTTGAC	yeast one-hybrid
ZmHSF3-AD2	ATGCTACGCGACCGGAAACTTCC	TCACCTCGAGTTGTTGGACCAGTC	yeast one-hybrid
ZmHSF6-AD2	ATGCAGGGCGGTGTCATGGC	CTACAGCCCATTCCCTGAGTCG	yeast one-hybrid
ZmHSP20-1-promoter-pHis2	GCGGGTTGAGGTTAGAGCGC	GAAGGATGGGGAAAGACGTTGAAGC	yeast one-hybrid
ZmHSP20-2-promoter-pHis2	TCTAGCATTCTCCACGCTCCAATACAG	TCTCCCTCAATTCCTAGAAGGGGTC	yeast one-hybrid
ZmHSP20-3-promoter-pHis2	CTATCCGGGTCTATCCGCGAAC	ATTGATTGAGCTTCGGATCGCTGCTTG	yeast one-hybrid
ZmHSP20-4-promoter-pHis2	CGACCAAGAGATTGTCGAAGATTCCAG	GTCTGTGGGTTTCTCGTGTGCC	yeast one-hybrid
ZmHSP20-5-promoter-pHis2	CTAGTGATAGAAAACTCTAGACAATTTTCCTAGGC	CTAACGGACCAAGATGCTCGTTATTTATAAGG	yeast one-hybrid
ZmHSP20-9-promoter-pHis2	GAAGAAGAAAGAAAGATATCCATTCCGTTCCAG	CATCACGAGGGAGGAGGAAGAAG	yeast one-hybrid
ZmHSP20-12-promoter-pHis2	GGCCCAGCCCAAAAAAACACACC	AGAATGGAGCGCGCTGGCG	yeast one-hybrid
ZmHSP20-14-promoter-pHis2	GCAAACCTTTGCAGAAAATTGAGGAAGACG	GTGACGAATAGCGCTGCATGCATTC	yeast one-hybrid
ZmHSP20-15-promoter-pHis2	AAGAGCACCCAAGGTACAGTGACTC	AGTGTGCTCGGGCTGCCTG	yeast one-hybrid
ZmHSP20-16-promoter-pHis2	GACTGCTCTGGAACAATGTGGGAC	GGCCTTGTGGGGTGACGC	yeast one-hybrid
ZmHSP20-20-promoter-pHis2	CCGACCCACTACACCTTTCCAAC	CCAGTCGGATGAGTCGCGAAG	yeast one-hybrid
ZmHSP20-21-promoter-pHis2	CAGAGCCACGAAACAATCGGTGC	GGGGTCACGTGACGAGGG	yeast one-hybrid
ZmHSP20-22-promoter-pHis2	TCGACATTCGACAGACTGGACTCG	GAGAATACCGTAGGAAGTGGCCC	yeast one-hybrid
ZmHSP20-26-promoter-pHis2	CAAATCTGCTTTCCATAGATCCTCAGCG	AGAGATGGAGATGACGATTGGTGTCC	yeast one-hybrid
ZmHSP20-27-promoter-pHis2	ACTACGCTCTAGAGACAACCAGACG	AGTCTGCCTCGTCAAATTTACAGAGCG	yeast one-hybrid
ZmHSP20-31-promoter-pHis2	ACGTAATTCCCAAACTAACTCTTAGCTTTCTCG	GACATGTGTACGTGGGTGGGTG	yeast one-hybrid
ZmHSP20-34-promoter-pHis2	GACCCTCGGATGGATAATTCAGAATTTAATCG	CTCCACTGCTGTAGTGCGTGC	yeast one-hybrid
ZmHSP20-35-promoter-pHis2	CAGACTTCTATTTTATTCGGGACTCTTCCG	GGGCTTCTGTTCTTCTGGAAGGC	yeast one-hybrid
ZmHSP20-38-promoter-pHis2	ATATCTCAGATATGCAACTGCATTCCACAGG	GCCGCCGGCCGGTTTATGAT	yeast one-hybrid
ZmHSP20-39-promoter-pHis2	GTAGACCGCACGAATCGCAAAGC	GACAGCGACGGGAGTCGG	yeast one-hybrid
ZmHSP20-40-promoter-pHis2	GGCACGTGACAGTTGCCACATC	GGTTCTGAAAGGTGGCTCCGTG	yeast one-hybrid
ZmHSP20-42-promoter-pHis2	AAACCTCGTGGCAACACACGGG	GCTTCTGGAAGGCGAAGGAAGG	yeast one-hybrid
ZmHSP20-43-promoter-pHis2	CCACGAACAAGAGATTGTCGAAGATTCC	GGCTTCCGGATGTTTCTCGTCTTG	yeast one-hybrid
ZmHSP20-44-promoter-pHis2	GTTTCAGGAGATCTCTCCCGCC	GGCGGGGTATATTTATAGCGTGGTG	yeast one-hybrid
ZmHSP20-1-BD	ATGGCAGCTGCTCCGTTCGCGATTGC	CTACTGGACCTGCACGTCGATGACCTTG	yeast two-hybrid
ZmHSP20-9-BD	ATGTGGCACGCCGCGGCGG	TCACTGCACCTGGATGTTGACGACCTTGGC	yeast two-hybrid
ZmHSP20-26-BD	ATGGCTTTAGCTCGTCTGTGC	TCACTGCACCTTCACCTCG	yeast two-hybrid
ZmHSP20-38-BD	ATGTCGGACTTCTTCTTCGGG	TCAGAGCTTGCTGGAGACG	yeast two-hybrid
ZmHSP20-41-BD	ATGGACGCGAGGATGTTCG	TCAGGCGACCTTAATCTCGATG	yeast two-hybrid
ZmHSP20-44-BD	ATGTCGAGGAGAGCCGCAGCAGCG	TCAGAGCTCCACCTTCTTGGTCTGATGATGACCA	yeast two-hybrid
ZmHSF2-AD	ATGGGCTTCACGAAGCGG	TCATGCTTCAGTTATGACATCAGCA	yeast two-hybrid
ZmHSF10 -AD	ATGGCCTCTTCCTCCTCGT	CTAGTCATAGTGCTCCACGAACT	yeast two-hybrid
ZmHSF15-AD	ATGCACCGCGCCCGCCCCA	CTACAGCTTCTTCATGCTTGGCTGCTGCTGAAGA	yeast two-hybrid
ZmHSF17-AD	ATGGACTCAACGCTGAACCAG	CTAATTGCTAGATGTTGGGCCATC	yeast two-hybrid
ZmHSF24-AD	ATGGGCTCCAAGAAGCGG	TCATGCTTCAGTTATGACATCAGCT	yeast two-hybrid
ZmHSF25-AD	ATGGCGTTGCCGGCGGCGGGGACGCC	TCATTTCAGCCCTAGACTGAGGCTCCTATCG	yeast two-hybrid
