# Supplementary material for: Genome-Wide Identification and Characterization of Heat Shock Protein 20 Genes in Maize
Source: Life (Basel). 2022 Sep 8;12(9):1397. doi: 10.3390/life12091397 (PMC9505046; doi:10.3390/life12091397)
Supplement: Supplementary file 1 [file life-12-01397-s001.zip › Table S2.xlsx]

## Sheet: Sheet1
Table S2. Information of 44 ZmHSP20s, including Gene, Gene ID, position start, position end, chromosome, isoelectric point (PI), molecular weight (MW), and predicted subcellular localization.
Gene	Gene_ID	Position_start	Position_end	Chromosome	pI	MW(kDa)	Subcellular localization
ZmHSP20-1	Zm00001d028408	33789050	33790182	1	7.86	26.38	Chloroplast
ZmHSP20-2	Zm00001d028555	38997819	38998295	1	5.55	17.79	Cytoplasm
ZmHSP20-3	Zm00001d028557	39085728	39086204	1	5.55	17.76	Cytoplasm
ZmHSP20-4	Zm00001d028561	39214417	39214896	1	6.86	17.88	Cytoplasm
ZmHSP20-5	Zm00001d030317	122082952	122084098	1	8.87	20.19	Plastid
ZmHSP20-6	Zm00001d030345	123930193	123931383	1	9.3	23.93	Plastid
ZmHSP20-7	Zm00001d030346	124047279	124048368	1	9.37	22.62	Plastid
ZmHSP20-8	Zm00001d031129	178803787	178805508	1	11.66	62.73	None
ZmHSP20-9	Zm00001d031325	186052724	186053956	1	8.06	27.44	Mitochondrial
ZmHSP20-10	Zm00001d032893	241798159	241799166	1	9.94	21.8	Nucleus/Cytoplasm
ZmHSP20-11	Zm00001d033478	263854042	263854993	1	6.52	33.22	None
ZmHSP20-12	Zm00001d003554	47866673	47867299	2	6	22.83	Endoplasmic Reticulum
ZmHSP20-13	Zm00001d004599	121335332	121345585	2	8.66	17.42	Cytoplasm
ZmHSP20-14	Zm00001d007271	226345272	226345835	2	5.98	20.21	Endoplasmic Reticulum
ZmHSP20-15	Zm00001d039566	8104720	8105217	3	5.95	17.87	Cytoplasm
ZmHSP20-16	Zm00001d039933	19846081	19846545	3	6.77	17.06	Cytoplasm
ZmHSP20-17	Zm00001d039935	19868724	19869483	3	8.03	13.98	Cytoplasm
ZmHSP20-18	Zm00001d039936	19966205	19966663	3	5.81	17.22	Cytoplasm
ZmHSP20-19	Zm00001d039941	20014552	20015052	3	5.02	17.4	Cytoplasm
ZmHSP20-20	Zm00001d039942	20067714	20068163	3	6.18	16.65	Cytoplasm
ZmHSP20-21	Zm00001d042842	181808569	181820628	3	6.52	46.21	Endoplasmic Reticulum
ZmHSP20-22	Zm00001d052194	182772609	182773786	4	6.47	23.82	Mitochondrial
ZmHSP20-23	Zm00001d053965	244409108	244409662	4	6.85	19.86	Cytoplasm
ZmHSP20-24	Zm00001d013641	16047468	16048445	5	9.64	34.69	None
ZmHSP20-25	Zm00001d014146	34118096	34118983	5	7.99	21.6	Nucleus/Cytoplasm
ZmHSP20-26	Zm00001d015777	118463714	118464650	5	6.86	22.82	Mitochondrial
ZmHSP20-27	Zm00001d017813	207525809	207526282	5	7.78	16.69	Cytoplasm
ZmHSP20-28	Zm00001d018298	218096889	218097874	5	6.6	18.35	Cytoplasm
ZmHSP20-29	Zm00001d037633	132470913	132487481	6	5.72	14.98	Cytoplasm
ZmHSP20-30	Zm00001d038608	160896290	160898350	6	4.75	21.88	Cytoplasm
ZmHSP20-31	Zm00001d039169	171663438	171664675	6	8.83	32.19	None
ZmHSP20-32	Zm00001d020390	110937105	110937825	7	6.16	17.46	Cytoplasm
ZmHSP20-33	Zm00001d021634	158645403	158646190	7	6.59	17.16	Cytoplasm
ZmHSP20-34	Zm00001d008577	13397318	13397785	8	5.82	17.34	Cytoplasm
ZmHSP20-35	Zm00001d008841	22307488	22307982	8	5.33	17.8	Cytoplasm
ZmHSP20-36	Zm00001d010693	124738149	124740137	8	4.8	21.18	Cytoplasm
ZmHSP20-37	Zm00001d011241	144284141	144285379	8	7.05	30.71	None
ZmHSP20-38	Zm00001d044728	593529	593969	9	8.06	15.85	peroxisome
ZmHSP20-39	Zm00001d044874	6096248	6097444	9	5.47	22.28	Mitochondrial
ZmHSP20-40	Zm00001d047542	134707072	134707554	9	6.17	17.45	Cytoplasm
ZmHSP20-41	Zm00001d047548	134965867	134966361	9	7.84	17.05	Cytoplasm
ZmHSP20-42	Zm00001d047553	135126430	135126924	9	7.84	17.05	Cytoplasm
ZmHSP20-43	Zm00001d047841	143024246	143024842	9	5.53	18.02	Cytoplasm
ZmHSP20-44	Zm00001d025508	120809943	120810596	10	6.08	23.44	Endoplasmic Reticulum
