# Supplementary material for: Genome-Wide Identification and Characterization of Heat Shock Protein 20 Genes in Maize
Source: Life (Basel). 2022 Sep 8;12(9):1397. doi: 10.3390/life12091397 (PMC9505046; doi:10.3390/life12091397)
Supplement: Supplementary file 1 [file life-12-01397-s001.zip › Table S3.xlsx]

## Sheet: Sheet1
Table S3. Predicted gene fragments for ZmHSP20 and HSF interaction.
ID of ZmHSF	ID of ZmHSP	Matched Sequence
ZmHSF-13	ZmHSP20-1	CGAGAATGTTC
ZmHSF-6	ZmHSP20-1	GAATGTTCAAGA
ZmHSF-13	ZmHSP20-1	CCGGAAGCTTC
ZmHSF-3	ZmHSP20-1	GTCCGGAAGCTTCA
ZmHSF-17	ZmHSP20-1	TGAAGCTTCCGGACA
ZmHSF-17	ZmHSP20-1	AGAATGTTCAAGAGA
ZmHSF-3	ZmHSP20-1	CTCTTGAACATTCT
ZmHSF-6	ZmHSP20-1	GAAGCTTCCGGA
ZmHSF-13	ZmHSP20-2	CTGGAGAGTTC
ZmHSF-6	ZmHSP20-2	GAACTCTCCAGA
ZmHSF-3	ZmHSP20-2	CTCCAGAAACTGCT
ZmHSF-17	ZmHSP20-2	AGAACTCTCCAGAAA
ZmHSF-3	ZmHSP20-2	TTCTGGAGAGTTCT
ZmHSF-13	ZmHSP20-3	CTGGAGAGTTC
ZmHSF-6	ZmHSP20-3	GAACTCTCCAGA
ZmHSF-3	ZmHSP20-3	CTCCAGAAACTGCT
ZmHSF-17	ZmHSP20-3	AGAACTCTCCAGAAA
ZmHSF-3	ZmHSP20-3	TTCTGGAGAGTTCT
ZmHSF-13	ZmHSP20-4	CTAGTACGTTC
ZmHSF-13	ZmHSP20-4	CTAGTAGGTTC
ZmHSF-13	ZmHSP20-4	CTGGATACTTC
ZmHSF-13	ZmHSP20-4	CTAGAACCTAC
ZmHSF-17	ZmHSP20-4	AGAACGTACTAGTTG
ZmHSF-6	ZmHSP20-4	GAAGTATCCAGA
ZmHSF-6	ZmHSP20-4	GAACCTACTAGA
ZmHSF-13	ZmHSP20-4	CTGGAATCTTC
ZmHSF-17	ZmHSP20-4	AGATTGATCTGGAAT
ZmHSF-3	ZmHSP20-4	TTCCAGATCAATCT
ZmHSF-17	ZmHSP20-4	AGAACCTACTAGATC
ZmHSF-3	ZmHSP20-4	ATCTGGAATCTTCG
ZmHSF-17	ZmHSP20-4	AGAAGTATCCAGAAG
ZmHSF-17	ZmHSP20-4	CGAAGATTCCAGATC
ZmHSF-3	ZmHSP20-4	TTCTGGATACTTCT
ZmHSF-3	ZmHSP20-4	ATCTAGTAGGTTCT
ZmHSF-6	ZmHSP20-4	GAAGATTCCAGA
ZmHSF-13	ZmHSP20-5	CTAGAGTTTTC
ZmHSF-6	ZmHSP20-5	GAAAACTCTAGA
ZmHSF-17	ZmHSP20-5	AGAAAACTCTAGACA
ZmHSF-3	ZmHSP20-5	GTCTAGAGTTTTCT
ZmHSF-13	ZmHSP20-6	CCAGATTATTC
ZmHSF-13	ZmHSP20-7	CCAGAAAAATC
ZmHSF-6	ZmHSP20-8	GAAGCTACTTGA
ZmHSF-3	ZmHSP20-9	TTCTAGACCTCTCT
ZmHSF-6	ZmHSP20-11	GATTCTTCCGGA
ZmHSF-13	ZmHSP20-12	CCCGAAGCATC
ZmHSF-17	ZmHSP20-12	CGAACCTTCTGGCTC
ZmHSF-17	ZmHSP20-12	GGAATCCTCTCGAGC
ZmHSF-6	ZmHSP20-12	GAATCCTCTCGA
ZmHSF-6	ZmHSP20-12	GATGCTTCGGGA
ZmHSF-6	ZmHSP20-12	GAACCTTCTGGC
ZmHSF-3	ZmHSP20-12	CTCCCGAAGCATCT
ZmHSF-13	ZmHSP20-12	CCAGAAGGTTC
ZmHSF-17	ZmHSP20-12	AGATGCTTCGGGAGA
ZmHSF-13	ZmHSP20-14	CTAGAAGCCTC
ZmHSF-17	ZmHSP20-14	GGAAGCCCCTAGAAG
ZmHSF-17	ZmHSP20-14	AGAAGCGCCTAGAAG
ZmHSF-17	ZmHSP20-14	AGGAGACTCTAGAAG
ZmHSF-3	ZmHSP20-14	TTCTAGAGTCTCCT
ZmHSF-6	ZmHSP20-14	GAGGCTTCTAGA
ZmHSF-17	ZmHSP20-14	AGAGGCTTCTAGAGT
ZmHSF-3	ZmHSP20-14	CTCTAGAAGCCTCT
ZmHSF-6	ZmHSP20-15	GAAGAGTCCGGA
ZmHSF-3	ZmHSP20-15	TTCCGGAAGAGTCC
ZmHSF-17	ZmHSP20-15	GGAAGAGTCCGGAAT
ZmHSF-3	ZmHSP20-15	TTTCAGAACCTTCC
ZmHSF-3	ZmHSP20-15	TTCCGGACTCTTCC
ZmHSF-6	ZmHSP20-16	GAATCGTCTGGA
ZmHSF-6	ZmHSP20-17	GAATGGTCCAGA
ZmHSF-3	ZmHSP20-17	TTCTAGAACTAGCT
ZmHSF-6	ZmHSP20-20	GAGTTTTCTAGA
ZmHSF-3	ZmHSP20-20	CTCTAGAAAACTCG
ZmHSF-17	ZmHSP20-21	GGAAAAATGCAGAAG
ZmHSF-13	ZmHSP20-22	CTGGAGTGTTC
ZmHSF-6	ZmHSP20-22	GAACACTCCAGA
ZmHSF-6	ZmHSP20-22	GAAGGTTCACGA
ZmHSF-3	ZmHSP20-22	TTCTGGAGTGTTCG
ZmHSF-3	ZmHSP20-22	TTCGTGAACCTTCT
ZmHSF-17	ZmHSP20-22	CGAACACTCCAGAAG
ZmHSF-17	ZmHSP20-22	AGAAGGTTCACGAAG
ZmHSF-3	ZmHSP20-23	TTCTAGATCCTGCA
ZmHSF-3	ZmHSP20-26	TTCCAGACGCGTCT
ZmHSF-13	ZmHSP20-27	CTAGTTTCTTC
ZmHSF-17	ZmHSP20-27	AGAAAGATGCAGAAC
ZmHSF-3	ZmHSP20-27	TTCTGCATCTTTCT
ZmHSF-17	ZmHSP20-27	AGAATCCCCTAGAAC
ZmHSF-6	ZmHSP20-27	GATGCTTCCCGA
ZmHSF-3	ZmHSP20-27	TTCGGGAAGCATCT
ZmHSF-17	ZmHSP20-27	AGATGCTTCCCGAAG
ZmHSF-13	ZmHSP20-28	CCAGAGCCTTC
ZmHSF-3	ZmHSP20-28	GTCCAGAGCCTTCC
ZmHSF-6	ZmHSP20-28	GAAGGCTCTGGA
ZmHSF-17	ZmHSP20-28	GGAAGGCTCTGGACG
ZmHSF-13	ZmHSP20-31	CTGGATTATTC
ZmHSF-3	ZmHSP20-31	TCCTGGATTATTCC
ZmHSF-17	ZmHSP20-34	AGATTTCTCTGGAAT
ZmHSF-3	ZmHSP20-34	TTCCAGAGAAATCT
ZmHSF-6	ZmHSP20-35	GAAGAGTCCCGA
ZmHSF-17	ZmHSP20-35	GGAAGAGTCCCGAAT
ZmHSF-3	ZmHSP20-35	TTCGGGACTCTTCC
ZmHSF-3	ZmHSP20-35	TTCCGGAAGAGTCC
ZmHSF-3	ZmHSP20-35	TTTCAGAACCTTCC
ZmHSF-13	ZmHSP20-38	CTGGATGGTTC
ZmHSF-13	ZmHSP20-38	CTGGAACCATC
ZmHSF-3	ZmHSP20-38	TTCTACAAAATTCG
ZmHSF-3	ZmHSP20-38	TTCCACAGGCTTCT
ZmHSF-6	ZmHSP20-38	GATGGTTCCAGA
ZmHSF-17	ZmHSP20-38	AGAAGCCTGTGGAAT
ZmHSF-17	ZmHSP20-38	CGAATTTTGTAGAAG
ZmHSF-17	ZmHSP20-38	GGATGGTTCCAGAAC
ZmHSF-3	ZmHSP20-38	TTCTGGAACCATCC
ZmHSF-13	ZmHSP20-39	CTGGAACCTTC
ZmHSF-17	ZmHSP20-39	AGAAGGTTCCAGAGT
ZmHSF-3	ZmHSP20-39	CTCTGGAACCTTCT
ZmHSF-6	ZmHSP20-39	GAAGGTTCCAGA
ZmHSF-13	ZmHSP20-40	CTGGATTCTTC
ZmHSF-17	ZmHSP20-40	AGAAGAATGTGGAGC
ZmHSF-6	ZmHSP20-40	GATTCTTCCGGA
ZmHSF-17	ZmHSP20-40	AGAACGTTGTTGAAG
ZmHSF-17	ZmHSP20-40	AGAACGTTGTTGAAG
ZmHSF-17	ZmHSP20-40	GGATTCTTCCGGAAT
ZmHSF-3	ZmHSP20-40	TTCCGGAAGAATCC
ZmHSF-3	ZmHSP20-40	TTTCAGAACCTTCC
ZmHSF-6	ZmHSP20-40	GAAGAATCCAGA
ZmHSF-17	ZmHSP20-40	GGAAGAATCCAGAAT
ZmHSF-3	ZmHSP20-40	TTCTGGATTCTTCC
ZmHSF-6	ZmHSP20-41	GGAGAATCTAGA
ZmHSF-6	ZmHSP20-41	GAAACAACTAGA
ZmHSF-6	ZmHSP20-41	GAAGAGTCCAGA
ZmHSF-3	ZmHSP20-41	TTTCAGAACCTTCC
ZmHSF-17	ZmHSP20-41	GGAAGAGTCCAGAAT
ZmHSF-3	ZmHSP20-41	TTCTGGACTCTTCC
ZmHSF-13	ZmHSP20-42	CTGGATTCTTC
ZmHSF-6	ZmHSP20-42	GAATAAACTAGA
ZmHSF-6	ZmHSP20-42	GATTCTTCCGGA
ZmHSF-3	ZmHSP20-42	CTCTAGTTTATTCT
ZmHSF-17	ZmHSP20-42	GGATTCTTCCGGAAT
ZmHSF-3	ZmHSP20-42	TTCCGGAAGAATCC
ZmHSF-3	ZmHSP20-42	TTTCAGAACCTTCC
ZmHSF-6	ZmHSP20-42	GAAGAATCCAGA
ZmHSF-17	ZmHSP20-42	GGAAGAATCCAGAAT
ZmHSF-3	ZmHSP20-42	TTCTGGATTCTTCC
ZmHSF-13	ZmHSP20-43	CGAGAAACATC
ZmHSF-13	ZmHSP20-43	CTAGAAGTTAC
ZmHSF-13	ZmHSP20-43	CTAGATTGATC
ZmHSF-13	ZmHSP20-43	CTAGTAACTTC
ZmHSF-17	ZmHSP20-43	AGATCAATCTAGCAG
ZmHSF-6	ZmHSP20-43	GAAACATCCGGA
ZmHSF-6	ZmHSP20-43	GAAGTTACTAGA
ZmHSF-13	ZmHSP20-43	CTGGAATCTTC
ZmHSF-17	ZmHSP20-43	AGATTGATCTGGAAT
ZmHSF-3	ZmHSP20-43	TTCCAGATCAATCT
ZmHSF-17	ZmHSP20-43	AGAAGTTACTAGATT
ZmHSF-3	ZmHSP20-43	ATCTGGAATCTTCG
ZmHSF-17	ZmHSP20-43	CGAAGATTCCAGATC
ZmHSF-17	ZmHSP20-43	AGAAACATCCGGAAG
ZmHSF-3	ZmHSP20-43	TTCCGGATGTTTCT
ZmHSF-3	ZmHSP20-43	ATCTAGTAACTTCT
ZmHSF-6	ZmHSP20-43	GAAGATTCCAGA
ZmHSF-13	ZmHSP20-44	CCGGATACTTC
ZmHSF-13	ZmHSP20-44	CTGGAAGTATC
ZmHSF-13	ZmHSP20-44	CTAGTATTTTC
ZmHSF-13	ZmHSP20-44	CGGGAAGCTTC
ZmHSF-17	ZmHSP20-44	CGAACCTTCTGGCTC
ZmHSF-6	ZmHSP20-44	GAAGCTTCCCGT
ZmHSF-3	ZmHSP20-44	GACTGGAAGCTTCC
ZmHSF-6	ZmHSP20-44	GAACCCTCTCGA
ZmHSF-6	ZmHSP20-44	GAACCTTCTGGC
ZmHSF-3	ZmHSP20-44	TACGGGAAGCTTCC
ZmHSF-6	ZmHSP20-44	GAAGCTTCCAGT
ZmHSF-13	ZmHSP20-44	CTGGAAGCTTC
ZmHSF-13	ZmHSP20-44	CCAGAAGGTTC
ZmHSF-17	ZmHSP20-44	GGAAGCTTCCCGTAG
ZmHSF-17	ZmHSP20-44	GGAAGCTTCCAGTCG
